# Supplementary material
Source: PubMed Central journal article supplement (PMC2948999)
Supplement: pp.110.154286_1.pdf [file pp.110.154286_1.pdf]

## Supplementary Methods

**PCR conditions and sequencing.** PCR reactions were carried out with a commercially available Taq polymerase (Go-Taq) from Promega (Promega: <http://www.promega.com>) with the recommended buffer. Denaturing was at 95°C for 2 min. This was followed by 40 cycles as follows: 95°C 30 sec, annealing for 30 sec as indicated above, and 72°C for 1 min 20 sec. The PCR products were then elongated for 5 min at 72°C. Primers were at a final concentration of 1µM, dNTPs 200 µM and MgCl<sub>2</sub> 2mM. Primers used are listed in Table S1. Sequencing was outsourced to MWG Biotech ([www.Eurofinsdna.com](http://www.Eurofinsdna.com)).

**Analysis of transcription by RT-PCR.** RNA was prepared with the TRIzol reagent from AppliChem GmbH ([www.applichem.com](http://www.applichem.com)) according to the manufacturers' instructions. We used the inflorescences of green house grown plants for wild-type *Columba*. For the *trs120* alleles, we pooled 50 -100 mutant five day old seedlings germinated on MS sucrose plates and used similarly grown *massue* seedlings as an additional control. For cDNA first-strand synthesis, we used the Moloney Murine Leukemia Virus Reverse Transcriptase, RNase H Minus (M-MLV RT [H-]), from Promega ([www.promega.com](http://www.promega.com)) together with an Oligo(dT)15 Primer and RNasin® Plus RNase Inhibitor, also from Promega, according to the manufacturer's instructions. Primers used for RT-PCR are: *AtTRS120* ( *fwd*: CTGCACAGTTCACTGCTTTGGTG,  *rev*: GACAATGGCCCTGCGTAGTG); *BET5* ( *fwd*: GGATCCAGTCAATGCGGATAAAGG,  *rev*: CTAAGATAATCTTAATACCAGAGGG). The region amplified with the *AtTRS120* RT-PCR primers is depicted by a line above the gene model in Figure 4.

| allele          | polymorphsim  | Fwd primer Sequence 5' -> 3' | Rev primer Sequence 5' -> 3'   | LB primer | Annealing Temp. [°C] |
|-----------------|---------------|------------------------------|--------------------------------|-----------|----------------------|
| <i>bet3</i>     | GABI_318C08   | TCT CCG GGA GTA AAA ACA AC*  | CAC GAT TTG AGA CAT TGT GAT AC | Lo8409    | 55.0                 |
| <i>bet5-1</i>   | SALK_099482   | AAGATAATCTGGAACCTGGCTGATTG*  | TCGCGTAAATCTCCGGTCTTTG         | LBa1      | 60.3                 |
| <i>bet5-2</i>   | SAIL_634_G07  | AGAAGAAAATGAGAACCAGGGAGATG*  | TGGTCAAGATGCAACAGTGGAAAG*      | LB3       | 60.6                 |
| <i>trs31</i>    | FLAG_488E06   | TCGATTTTCGAGCATCTGCTGATTGG   | CAACAAACGCTCCGCAGTTGAATG*      | LB4       | 62.0                 |
| <i>trs33-1</i>  | SALK_109244   | GCAAACAGAAGCCTGCAATGG*       | TGAGGCATGTTTTGTTGCTTCTG        | LBb1.3    | 55.8                 |
| <i>trs33-2</i>  | SALK_109724   | GCAAACAGAAGCCTGCAATGG*       | TGAGGCATGTTTTGTTGCTTCTG        | LBb1.3    | 55.8                 |
| <i>trs120-1</i> | SALK_125246   | CTTTGCCACTGTCCCTCGTC*        | TGAGCATTGGCATCAACAGG*          | LBb1.3    | 55.8                 |
| <i>trs120-2</i> | SALK_021904   | CTTTGCCACTGTCCCTCGTC*        | TGAGCATTGGCATCAACAGG*          | LBb1.3    | 55.8                 |
| <i>trs120-3</i> | SALK_111574   | GGGCATCCATGTCAAAAGTGTC*      | TTTTGCCAGAGTCAGCTAAGAACC       | LBa1      | 60.3                 |
| <i>trs120-4</i> | SAIL_1285_D07 | TGATTGAGCATGGTTTTCTGGAG      | TGTCCACTTGGGAGGAATGG*          | LB3       | 58.9                 |
| <i>vps53-1</i>  | SALK_047230   | TCCAATGTACCAGCTCCTTC         | ACCCAAACCAGCTCATTGTC           | LBb1.3    | 55.8                 |
| <i>vps52-2</i>  | SALK_055433   | TCATGATCCAGCCTTTTG*          | TCAACTCACCTTCAGTACAGC          | LBb1.3    | 51.4                 |
| <i>vps53-2</i>  | SAIL_87_D06   | GTGCAAAATTCATCACATGACACAC    | AGAACATAACCACGACAATCACTGC      | LB3       | 59.3                 |
| <i>vps53-3</i>  | GABI_400C01   | CGCGTATCAAAATATTTCTTC*       | TGTTGCTTGGTTTACGTAGG           | Lo8409    | 52.0                 |
| <i>vps53-4</i>  | SAIL_117_D11  | CAACCACCTTATCTAAGACCGTGAAG   | CGCTTCACGAGATTATTTTGTTC        | LB3       | 59.3                 |
| <i>vps53-5</i>  | GABI_463D10   | GGAAACAAAGGTGGGAATTG         | CCTGATGCCTAAACCCTTTG*          | Lo8409    | 55.3                 |
| <i>vps54-1</i>  | SALK_036485   | GATCCGACTTCCATGGCTAC*        | TGGCGGAAGCAGTATAGACC*          | LBb1.3    | 55.8                 |
| <i>vps54-2</i>  | SALK_062261   | TTCCCGGTCTTTATTGTTGG         | TTTGCTCGCGAGAGATAAGC*          | LBb1.3    | 55.3                 |

**Table S1. Primers used for characterizing or sequencing polymorphisms.** a: The primer denoted by an asterisk was used together with the T-DNA left border LB primer to amplify the DNA insertion and flanking genomic sequences, as described at <http://signal.salk.edu>. Annealing times were 30sec for all primer pairs. T-DNA primers were: LBa1: TGTTACGTTAGTGGGCCATCG; Lb3: TAGCATCTGAATTTTATAACCAATCTCGATACAC; LbB1.3: ATTTTGGCGATTTTCGGAAC; LBo8409: ATATTGACCATCATACTCATTGC; LB4: CGTGTGCCAGGTGCCACGGAATAGT.

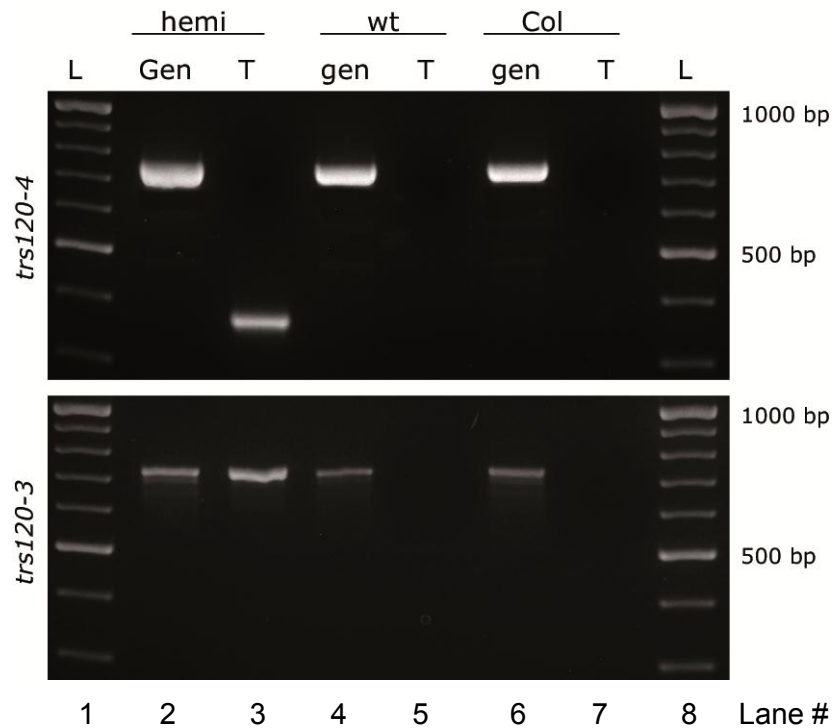

**Figure S1. Segregation analysis of the *trs120-3* and *trs120-4* T-DNA insertion**

Hemizygote T-DNA insertion lines were planted and single progeny analyzed. Hemi: hemizygote segregant, wt: homozygote wild-type segregant; Col: Columbia wild-type control; L: DNA 100 bp ladder (MBI). Gen: genomic primers used to amplify genomic DNA. T: T-DNA LB (left border) primer used with one genomic primer to amplify sequences flanking the insertion. In the hemizygous segregant, an upper band at c. 700bp with the genomic primers (Gen) is in both alleles of *trs120* (lane 2). Because the T-DNA would disrupt the gene, this band indicates the presence of at least one wild-type copy of the gene. The hemizygous lines can also be seen to harbour a T-DNA insertion (lane 3). In both the wild-type segregants and the Columbia control, a genomic band is present (lanes 4 and 6) but no T-DNA insertion was detected (absence of a band in lanes 5 and 7). In brief, the T-DNA can only be found in the hemizygous (hemi) individuals, which also invariably segregate the cytokinesis-defective phenotype.

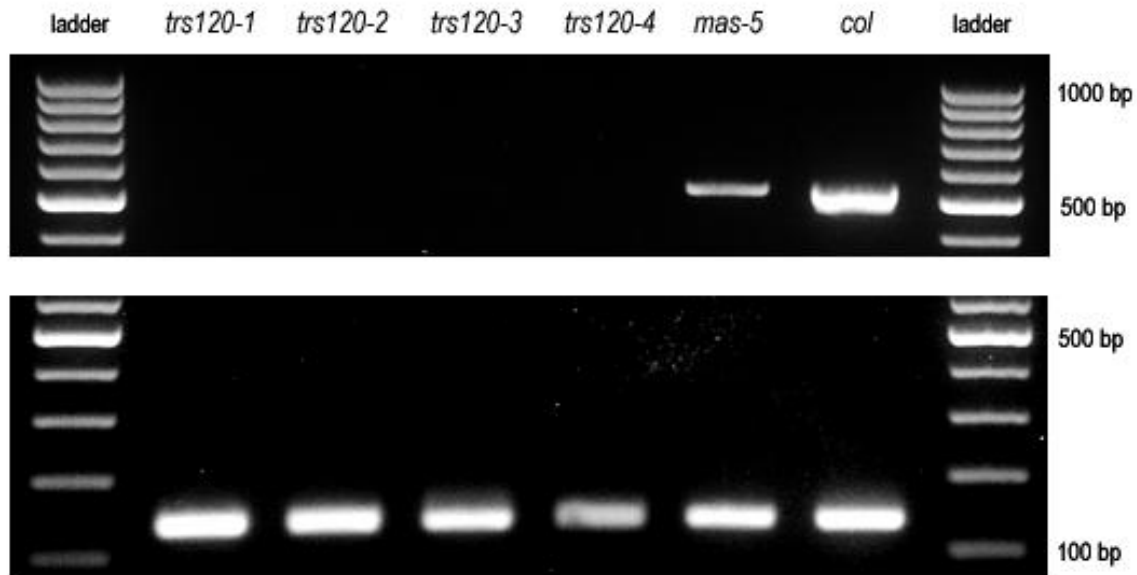

**Figure S2.** RT-PCR showing the absence of transcripts downstream of the insertion sites (upper panel; see Fig. 4). *BET5* primers were used as a positive control for the RNA isolation and reverse transcription (lower panel).
